# Supplementary material for: Emergence of Metastable State Dynamics in Interconnected Cortical Networks with Propagation Delays
Source: PLoS Comput Biol. 2013 Oct 24;9(10):e1003304. doi: 10.1371/journal.pcbi.1003304 (PMC3812055; doi:10.1371/journal.pcbi.1003304)
Supplement: Table S1 — Multistability as a function of propagation delays (Figure 3D and 3E). (XLSX) [file pcbi.1003304.s016.xlsx]

## Sheet: Sheet1
	Rapid fire [%]		Slow propagating [%]		Spiral wave state [%]		State transitions [Hz]
Delay	Mean	SEM	Mean	SEM	Mean	SEM	Mean	SEM
0 msec	99.31	0.24	0.69	0.24	0	0	0.0088	0.0031
1 msec	99.62	0.18	0.37	0.18	0	0	0.0075	0.0035
2 msec	99.06	0.28	0.88	0.27	0.06	0.06	0.0138	0.0041
5 msec	98.44	0.59	1.06	0.32	0.5	0.5	0.015	0.0041
10 msec	98.75	0.55	0.69	0.24	0.56	0.5	0.01	0.0032
30 msec	95.75	0.88	3.31	0.64	0.94	0.55	0.0475	0.0093
50 msec	76.88	2.26	21.94	2.15	1.19	0.37	0.135	0.0134
